# Supplementary material for: Polygonum multiflorum Thunb.: A Review on Chemical Analysis, Processing Mechanism, Quality Evaluation, and Hepatotoxicity
Source: PubMed Central journal article supplement (PMC5912012; doi:10.3389/fphar.2018.00364), 2018-04-16
Supplement: Presentation1.pdf [file Presentation1.pdf]

## *Supplementary Material*

# ***Polygonum multiflorum* Thunb.: A Review on Chemical Analysis, Processing Mechanism, Quality Evaluation and Hepatotoxicity**

Yue Liu<sup>1,2</sup>, Qi Wang<sup>2</sup>, JianBo Yang<sup>2</sup>, XiaoHan Guo<sup>2</sup>, WenXi Liu<sup>2</sup>, ShuangCheng Ma<sup>2,3\*</sup>, ShaoPing Li<sup>4\*</sup>

**\* Correspondence:**

ShuangCheng Ma, E-mail: masc@nifdc.org.cn.

ShaoPing Li, E-mail: spli@umac.mo, lishaoping@hotmail.com.

### Supplementary Figures

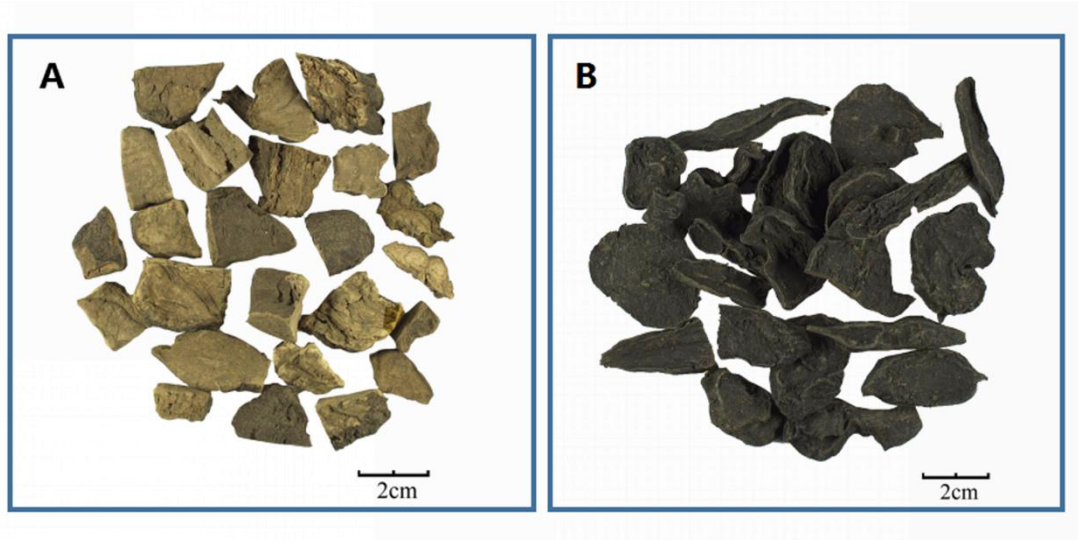

**Supplementary Figure 1.** The roots of *Polygonum multiflorum* (A); the roots of *P. multiflorum* Praeparata (B).

Note: Based on the botanical perspective, *Polygonum multiflorum* Thunb. is a synonym of *Reynoutria multiflora* (Thunb.) Moldenke.

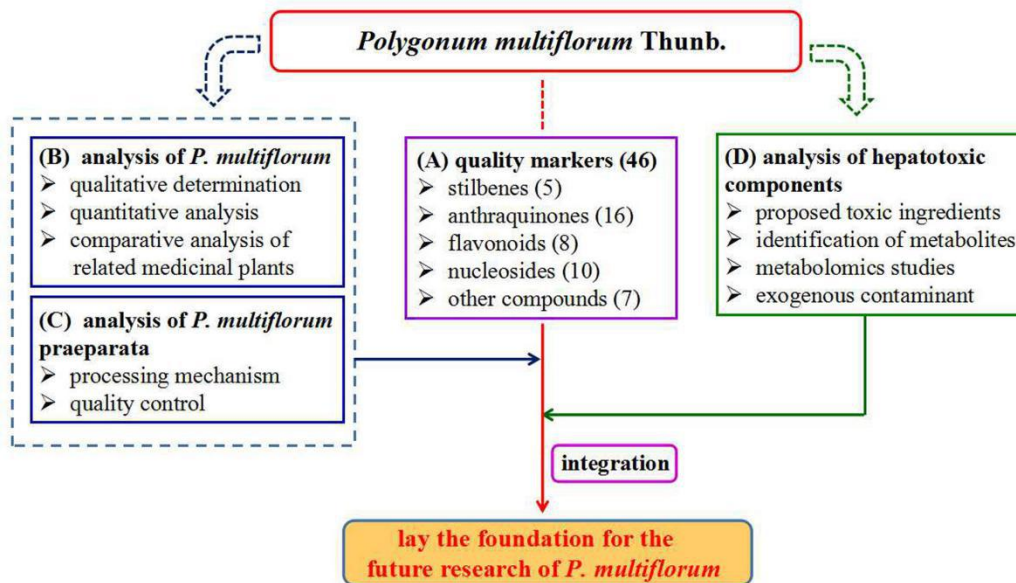

**Supplementary Figure 2.** Schematic diagram of the review process.

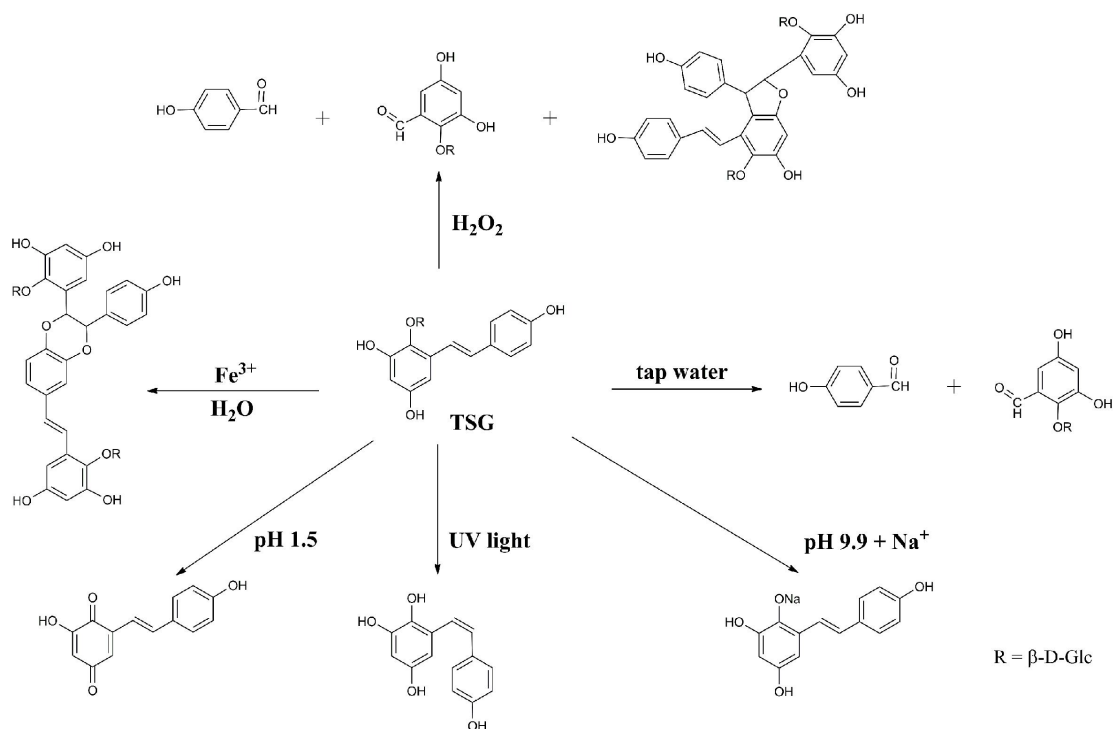

**Supplementary Figure 3.** Proposed transformation pathway of TSG in different solutions.
